# Supplementary material
Source: Springer Nature journal article supplement (https://www.springermedizin.de/resource/supplementary/12993_2013_480_MOESM5_ESM.pdf/9616838)

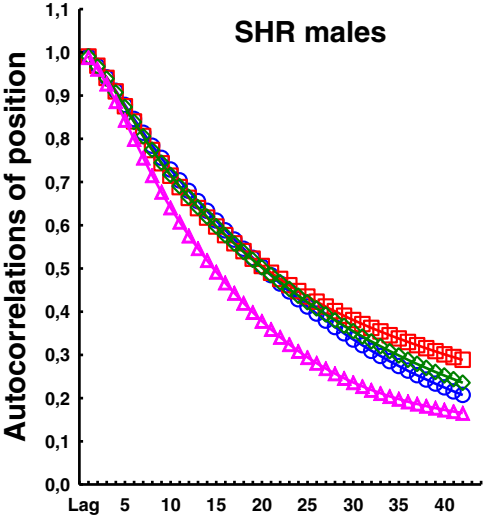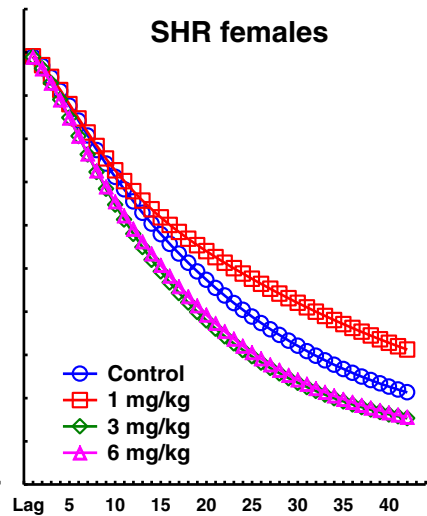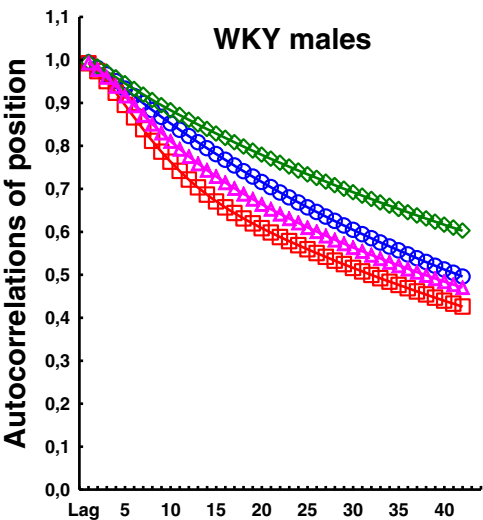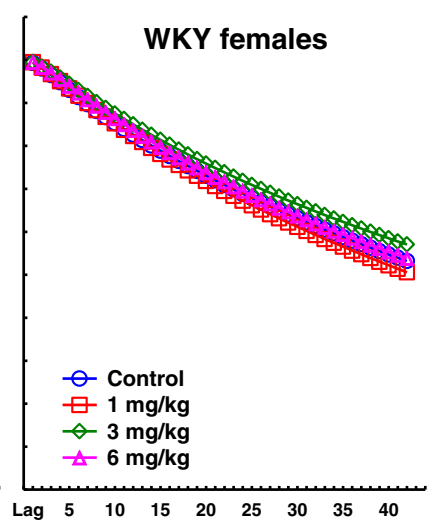

Supplement: MOESM5 [file 9616838]
